# Supplementary material
Source: Springer Nature journal article supplement (https://www.springermedizin.de/resource/supplementary/13018_2007_66_MOESM6_ESM.pdf/9636250)

**A**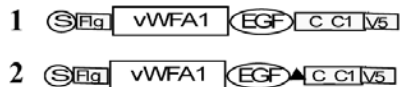**C**

|         |            |                    |
|---------|------------|--------------------|
| chicken | 445        | 455                |
|         | QMKICVEEDP | CCECKSIVKF         |
| human   | QKKICVEEDP | CACESLVKF          |
| mouse   | QKQICVEEDP | CACESILKF          |
|         | <b>EGF</b> | <b>coiled-coil</b> |

**B**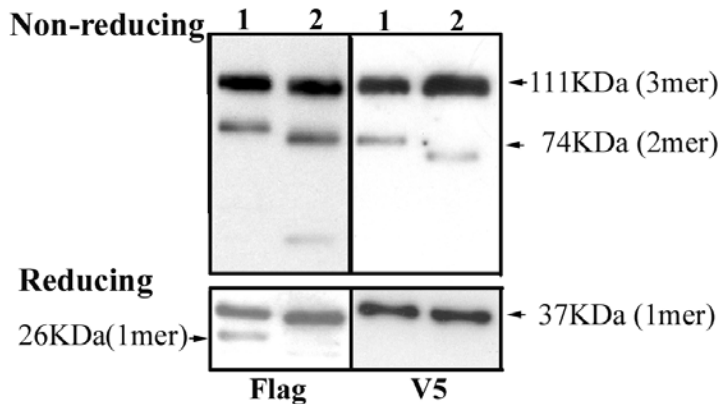**D**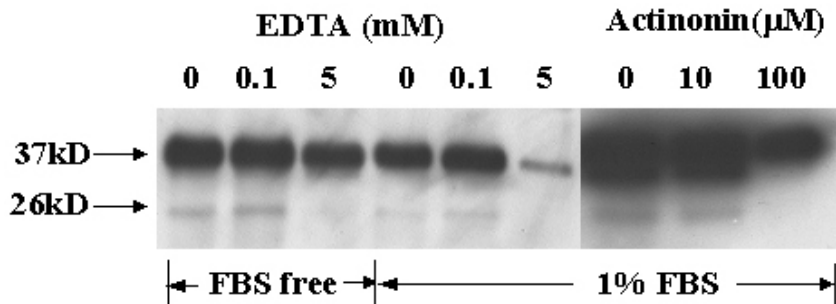

Supplement: MOESM6 [file 9636250]
